# Supplementary material for: Fabrication of organogels composed from carbon nanotubes through a supramolecular approach
Source: Royal Society of Chemistry journal article supplement (doi:10.1039/c0nj00175a), 2010-01-01
Supplement: c0nj00175a.pdf [file c0nj00175a.pdf]

## Supporting information

### Fabrication of Carbon Nanotubes Composed Organogels through Supramolecular Approach

Ye Tian<sup>a</sup>, Li Zhang<sup>a</sup>, Pengfei Duan<sup>a</sup>, Fuyong Liu<sup>b</sup>, Baoqing Zhang<sup>b</sup>, Chenyang Liu<sup>b</sup>, and Minghua Liu<sup>\*a</sup>

<sup>a</sup> Beijing National Laboratory for Molecular Science (BNLMS), CAS Key Laboratory of Colloid, Interface and Chemical Thermodynamics, Institute of Chemistry, The Chinese Academy of Sciences, Beijing, 100190, People's Republic of China. TEL: (+) 86-010-82615803; FAX: (+) 86-010-62569564; E-mail: [liumh@iccas.ac.cn](mailto:liumh@iccas.ac.cn)

<sup>b</sup> Key Laboratory of Engineering Plastics, Institute of Chemistry, Chinese Academy of Sciences, Beijing 100190, People's Republic of China.

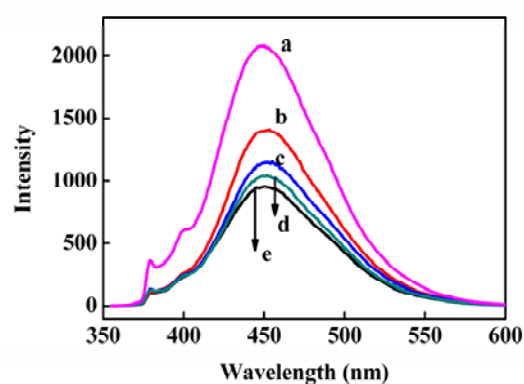

Fig. S1 Fluorescence Spectra of LPG organogel (a); 0.5% SWNT ( $w_{\text{SWNTs}}/w_{\text{gelator}}$ ) doped LPG organogel (b); 1% SWNT doped LPG organogel (c); 2% SWNT doped LPG organogel (d); 4% SWNT doped LPG organogel (e).

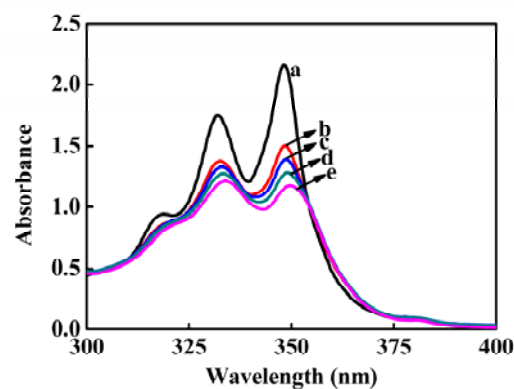

Fig. S2 UV-vis Spectra of LPG hot solution ( $2\text{mg mL}^{-1}$ ) (a); cooling down in the room temperature for 5mins (b); 10mins (c); 15mins (d); 20mins (e)

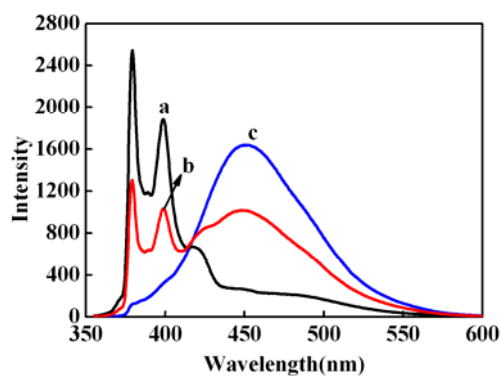

Fig. S3 Fluorescence Spectra of LPG hot solution ( $2\text{mg mL}^{-1}$ ) (a); cooling down in the room temperature for 3mins (b); one hour (c).

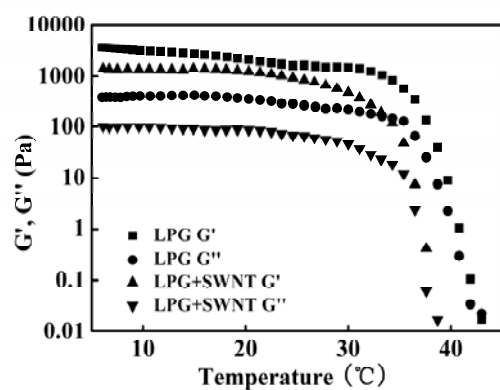

Fig. S4 Temperature decreasing sweep experiments:  $G'$  and  $G''$  for LPG organogels and 1% SWNT ( $w_{\text{SWNTs}}/w_{\text{gelator}}$ ) doped LPG organogels.

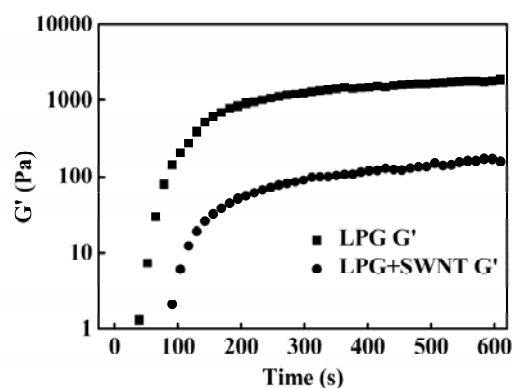

Fig. S5 Gelation kinetic sweep experiments:  $G'$  for LPG organogels and 1% SWNT ( $w_{\text{SWNTs}}/w_{\text{gelator}}$ ) doped LPG organogels.

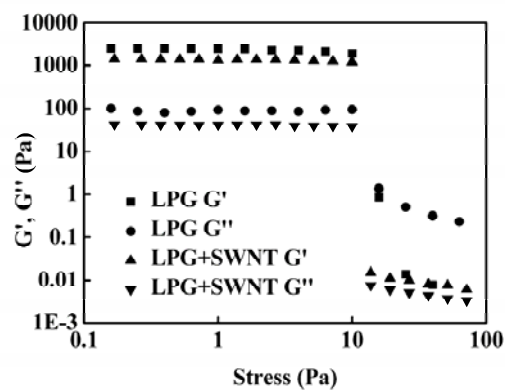

Fig. S6 Yield Shear Stress sweep experiments:  $G'$  and  $G''$  for LPG organogels and 1% SWNT ( $w_{\text{SWNTs}}/w_{\text{gelator}}$ ) doped LPG organogels.
